# Supplementary material for: Therapeutic vaccination against autologous cancer stem cells with mRNA-transfected dendritic cells in patients with glioblastoma
Source: Springer Nature journal article supplement (doi:10.1007/s00262-013-1453-3), 2013-07-01
Supplement: MOESM1 [file 8232424]

## Supplementary information

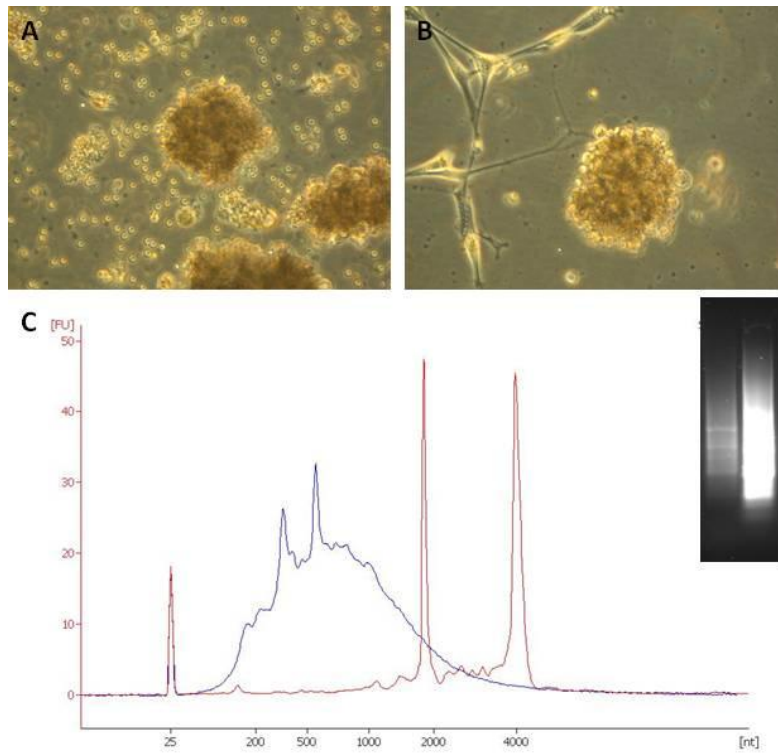

### Suppl. Fig. 1: Tumorspheres and RNA quality

Cancer stem cells were cultivated under serum-free conditions producing primary (A), secondary, and tertiary (B) tumorspheres. Microelectrophoresis curves from total RNA (red) and amplified mRNA (blue) (C). Agarose gel electrophoresis under denaturing conditions display a smear present in total RNA (left) and amplified mRNA (right) (insert in C).

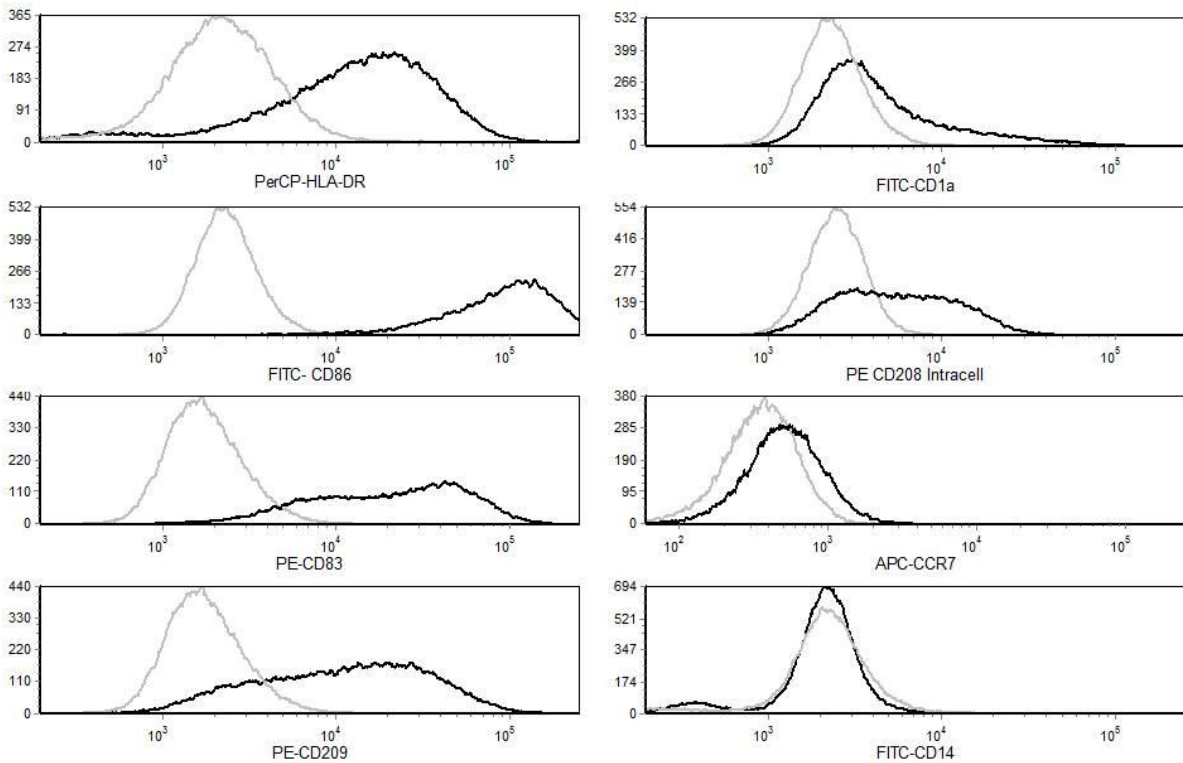

**Suppl. Fig. 2: Flow cytometric analysis of *ex vivo* generated monocyte-derived dendritic cells in one representative patient**

Specific antibody, dark curve. Isotype control, grey curve. Cells express high levels of HLA-DR in combination with the co-stimulatory CD86-molecule. Cells display a typical DC phenotype CD83+, CD208+, CD1a+, and CD209+. They contained both CD83- CD14- and CD83+ CD14- populations, where the CD83+ positive population was CD86+ and the CD83- were CD86dim. Some cells express the chemokine receptor CCR7+ present in a subset of mature DCs. Cells are monocyte marker CD14-.

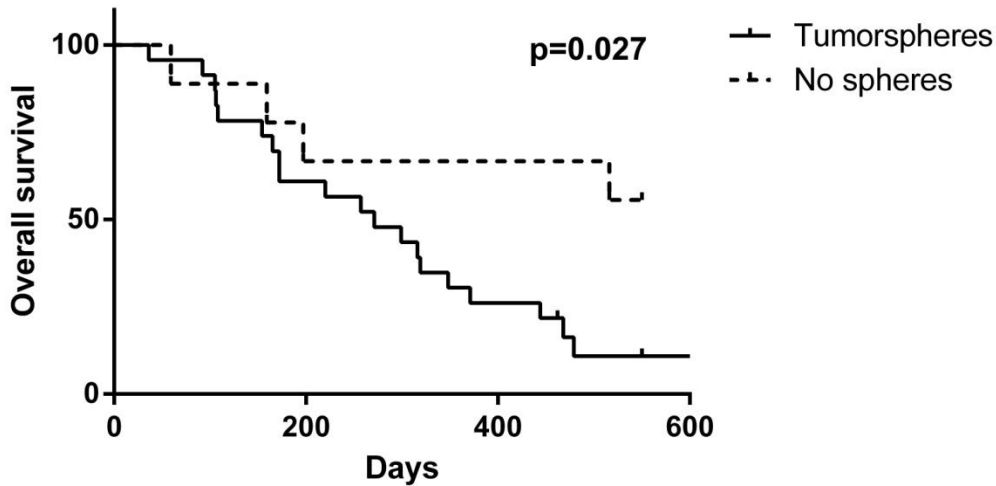

**Suppl. Fig. 3: Overall survival according to biopsies ability to be propagated as tumorspheres**

In a preclinical evaluation of a Good Manufacturing Procedure (GMP) transferable protocol biopsies from 32 glioblastoma patients were grown under serum-free, growth factor enriched conditions. In the 23 cultures able to produce tertiary tumorspheres during eight weeks, the median survival was 271 days, compared to a median not reached for those patients where cultures produced no tumorspheres ( $p=0.027$ , Log-rank test). For individual patient data please see Suppl. Table 2.

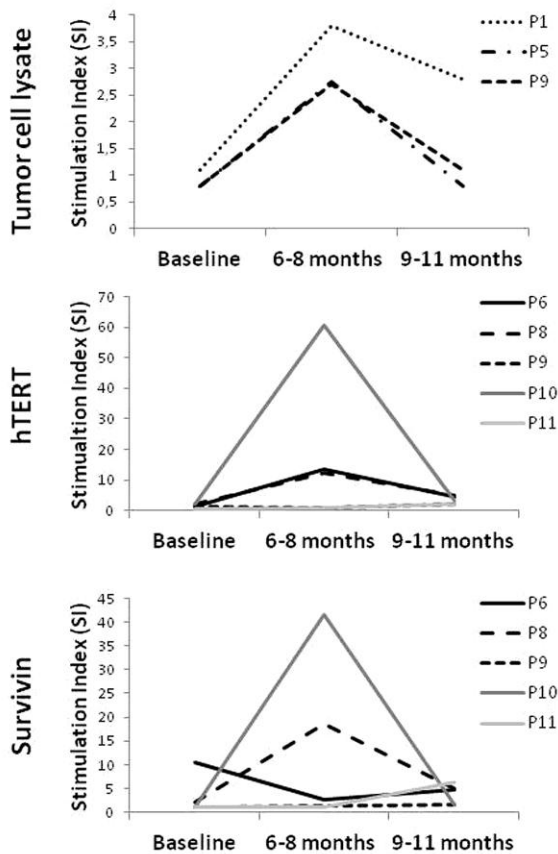

**Suppl. Fig. 4: Immune response evaluated by lymphocyte proliferation upon stimulation by tumorsphere lysate (top) or a mixture of peptides from hTERT (middle) or survivin (bottom)**

Peripheral blood lymphocytes were harvested before surgery, during vaccination (6-8 months) and at the end of vaccination period (9-11 months). All patients developed a significant T-lymphocytes proliferation response induced by tumorsphere lysate (TSL), hTERT or survivin peptide *in vitro*. In patient #6, #8, #10 and #11 there were not enough tumorsphere cellular material to allow for testing of induced T-lymphocyte proliferation. hTERT- and survivin-mRNA transfected DCs was added to the treatment from patient #6. Please refer to Table 2 for numeric values.

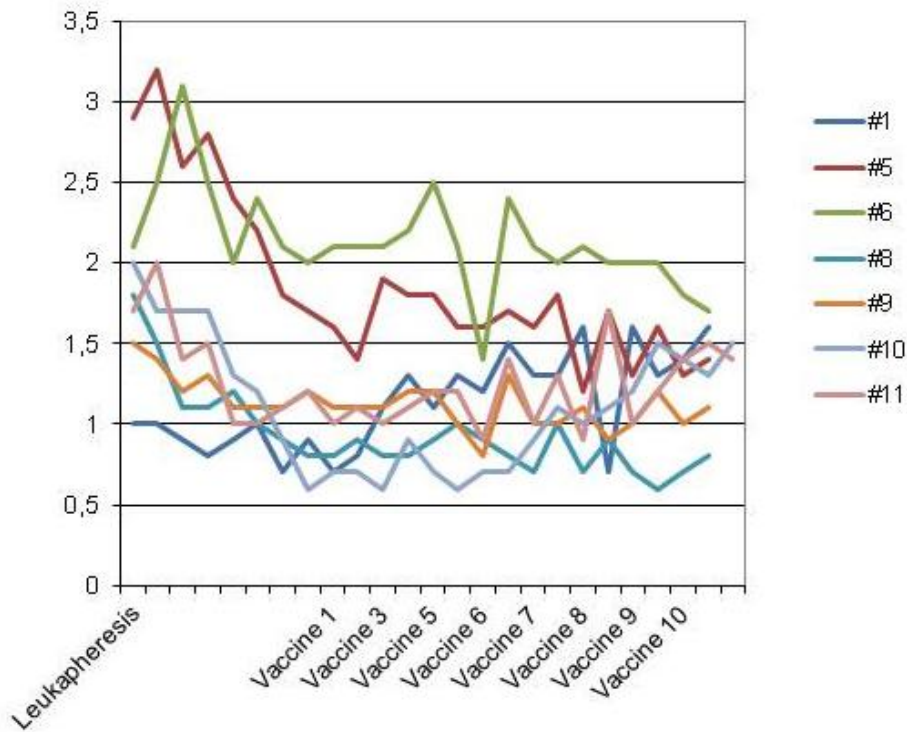

**Suppl. Fig. 5: Lymphocyte levels in vaccinated patients**

In the seven presented patients lymphocyte levels were below  $1.1 \times 10^9$  cells/ml, considered lymphopenic, at 29 of 70 time points of the ten first vaccinations.

| #  | Age, sex | RPA | ECOG | Preop Tumor Vol | Postop Tumor Vol | PFS days | OS days |
|----|----------|-----|------|-----------------|------------------|----------|---------|
| 1  | 49. M    | 3   | 0    | 6.2             | 0                | 223      | 662     |
| 2  | 56. F    | 4   | 0    | 26.8            | 0                | 140      | 820     |
| 3  | 56. M    | 4   | 1    | 26.0            | 0                | 154      | 1009    |
| 4  | 54. M    | 4   | 1    | 10.7            | 0                | 248      | 569     |
| 5  | 68. F    | 4   | 1    | 0.9             | 0.3              | 222      | 424     |
| 6  | 49. F    | 3   | 1    | 18.8            | 1.6              | 255      | 325     |
| 7  | 63. F    | 4   | 1    | 5.3             | 1.7              | 193      | 246     |
| 8  | 48. M    | 3   | 1    | 19.9            | 1.8              | 357      | 488     |
| 9  | 60. F    | 4   | 1    | 38.5            | 3.0              | 339      | 980     |
| 10 | 59. M    | 4   | 1    | 12.6            | 4.7              | 538      | 601     |

**Suppl. Table 1: Historical control patients characteristics**

Abbreviations: F; female. M; male. RPA; Recursive partitioning analysis group for prognostic differentiation according to the Radiation Therapy Oncology Group (RTOG) (31). NA; not applicable.

| Pat #                     | Age | ECOG | # surgery | Resection grade | Survival | Diagnosis              |
|---------------------------|-----|------|-----------|-----------------|----------|------------------------|
| <b>Sphere forming</b>     |     |      |           |                 |          |                        |
| 1                         | 60  | 2    | 1         | ST              | 299      | GBM. primary           |
| 2                         | 51  | 2    | 1         | ST              | 316      | GBM. primary           |
| 3                         | 65  | 1    | 1         | ST              | 659      | GBM w/ Oligo component |
| 4                         | 77  | 3    | 1         | ST              | 154      | GBM. primary           |
| 5                         | 71  | 2    | 1         | ST              | 271      | GBM. primary           |
| 6                         | 73  | 2    | 1         | ST              | 92       | GBM. primary           |
| 9                         | 82  | 2    | 1         | ST              | 108      | GBM. primary           |
| 10                        | 60  | 3    | 2         | ST              | 106      | GBM. secondary         |
| 12                        | 59  | 1    | 1         | ST              | 528      | GBM. primary           |
| 15                        | 48  | 3    | 1         | ST              | 444      | GBM. primary           |
| 16                        | 48  | 4    | 1         | ST              | 319      | GBM. primary           |
| 17                        | 76  | 3    | 1         | ST              | 172      | GBM. primary           |
| 18                        | 84  | 0    | 1         | T               | 257      | GBM. primary           |
| 19                        | 61  | 1    | 1         | T               | 468      | GBM. primary           |
| 21                        | 45  | 0    | 2         | T               | 462      | GBM. secondary         |
| 24                        | 69  | 3    | 1         | ST              | 220      | GBM. primary           |
| 25                        | 65  | 3    | 1         | ST              | 36       | GBM. primary           |
| 26                        | 63  | 1    | 1         | T               | 479      | GBM. primary           |
| 27                        | 62  | 1    | 1         | T               | 371      | GBM. primary           |
| 28                        | 62  | 1    | 1         | ST              | 105      | GBM. primary           |
| 29                        | 60  | 2    | 1         | ST              | 165      | GBM. primary           |
| 30                        | 56  | 1    | 1         | ST              | 172      | GBM. primary           |
| 32                        | 81  | 1    | 2         | ST              | 348      | GBM. primary           |
| <b>Non-sphere forming</b> |     |      |           |                 |          |                        |
| 7                         | 68  | 3    | 1         | ST              | 159      | GBM. primary           |
| 8                         | 67  | 3    | 1         | ST              | NA       | GBM. primary           |
| 11                        | 59  | 1    | 2         | T               | NA       | GBM. primary           |
| 13                        | 62  | 2    | 1         | ST              | NA       | GBM. primary           |
| 14                        | 62  | 2    | 1         | T               | 516      | GBM. primary           |
| 20                        | 57  | 2    | 1         | ST              | 197      | GBM. primary           |
| 22                        | 27  | 2    | 2         | ST              | NA       | GBM. secondary         |
| 23                        | 63  | 1    | 1         | ST              | NA       | GBM. primary           |
| 31                        | 80  | 2    | 1         | ST              | 59       | GBM. primary           |

**Suppl. Table 2: Clinical data on 34 consecutive patients with glioblastoma where biopsies tested for sphere forming ability**
